# Supplementary material for: Disrupted progression of the intestinal microbiota with age in children with cystic fibrosis
Source: PubMed Central journal article supplement (PMC4855157; doi:10.1038/srep24857), 2016-05-04
Supplement: srep24857-s1.pdf [file srep24857-s1.pdf]

**Supplementary material for:**

**Disrupted progression of the intestinal microbiota with age in children with cystic fibrosis**

Shaun Nielsen\*<sup>1,2</sup>, Bronwen Needham<sup>2</sup>, Steven T. Leach<sup>3</sup>, Andrew S. Day<sup>4</sup>, Adam Jaffe<sup>3,5</sup>, Torsten Thomas<sup>1,2</sup>, Chee Y. Ooi\*<sup>3,6</sup>

<sup>1</sup>Centre for Marine Bio-innovation, <sup>2</sup>School of Biotechnology and Biomolecular Sciences, and <sup>3</sup>Discipline of Paediatrics, School of Women's and Children's Health, Medicine, University of New South Wales, Sydney, 2052, Australia

<sup>4</sup>Department of Paediatrics, University of Otago, Christchurch, 8011, New Zealand

<sup>5</sup>Department of Paediatric Respiratory and <sup>6</sup>Department of Paediatric Gastroenterology, Sydney Children's Hospital, Randwick, 2031, Australia

\* Corresponding authors

E-mail: [s.nielsen@unsw.edu.au](mailto:s.nielsen@unsw.edu.au), [keith.ooi@hongyee.org](mailto:keith.ooi@hongyee.org)

Tel: +61 2 9385 2741

Supplementary figures.

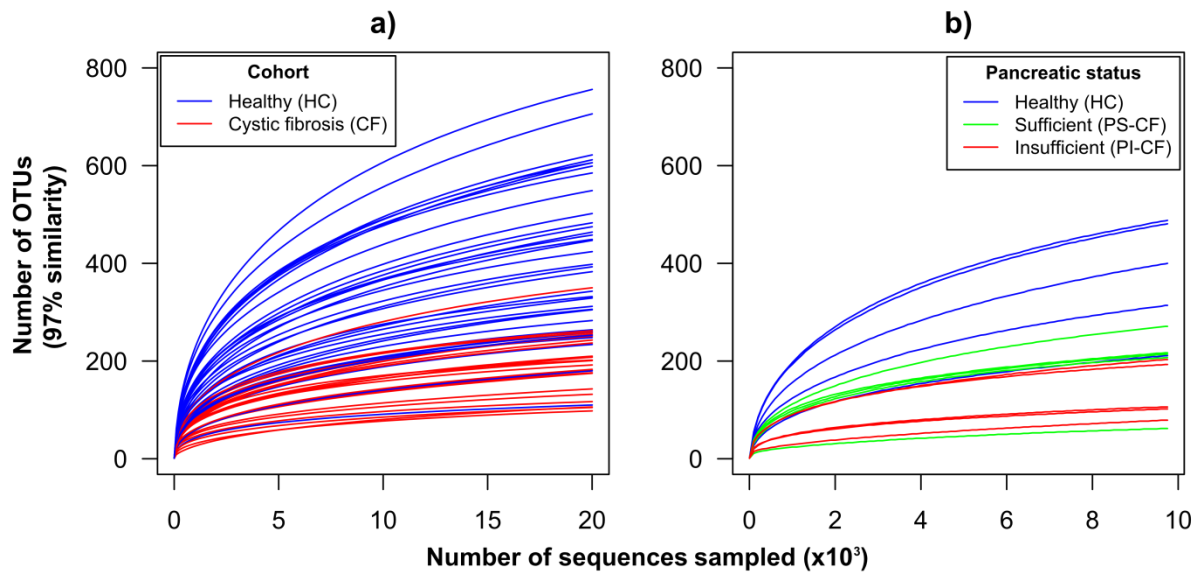

**Supplementary Figure 1.** The number of OTUs (97 % similarity) given the number of 16S rRNA gene sequences sampled per stool sample. a) samples from healthy vs CF comparisons with 20 008 total sequences per stool, b) samples from the pancreatic status comparison with 9751 total sequences per stool sample.

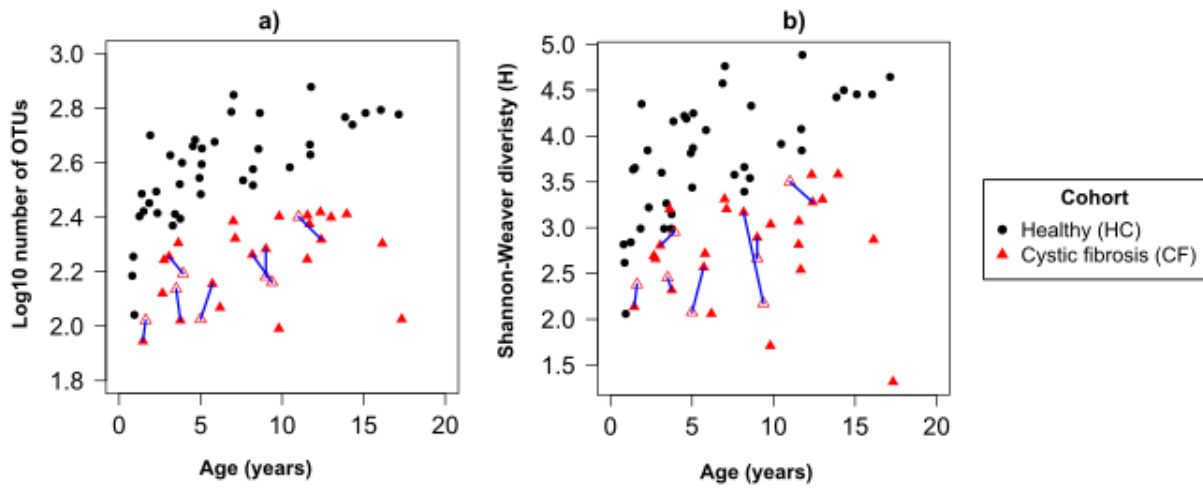

**Supplementary Figure 2.** Within-subject variability of a) the Log10 number of OTUs and b) the Shannon-Weaver index of diversity with the CF cohort. Subjects are connected by blue lines with the second sample symbol unfilled, and show within-variability is within the normal variability observed within the cohort for both alpha-diversity measures.

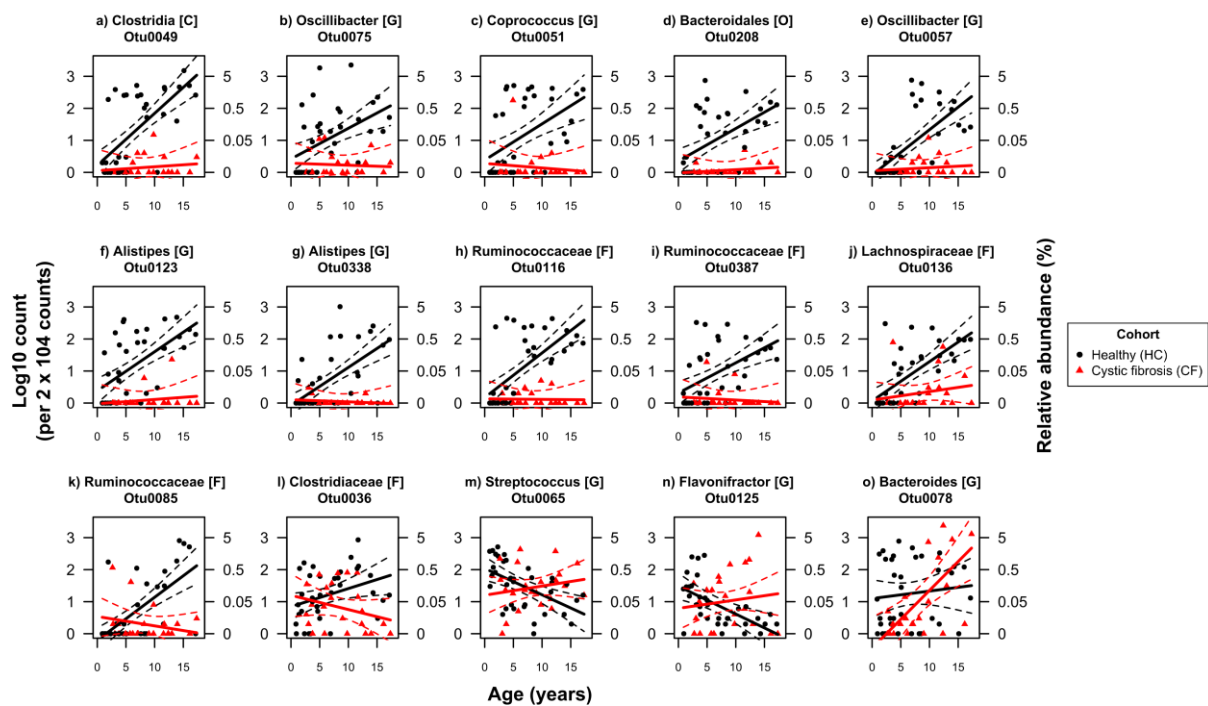

**Supplementary Figure 3.** Patterns of abundances of OTUs showing interactions between the covariates age and CF condition (based on F values > 5). The figure shows the different relationship types between age and the abundance of OTUs in gut microbiomes communities from CF and healthy (HC) children. Fitted lines are constructed from general linear models. Letters in square brackets following taxonomic names denote the lowest level of taxonomic classification, G = genus, F = family, O = order, C = class.

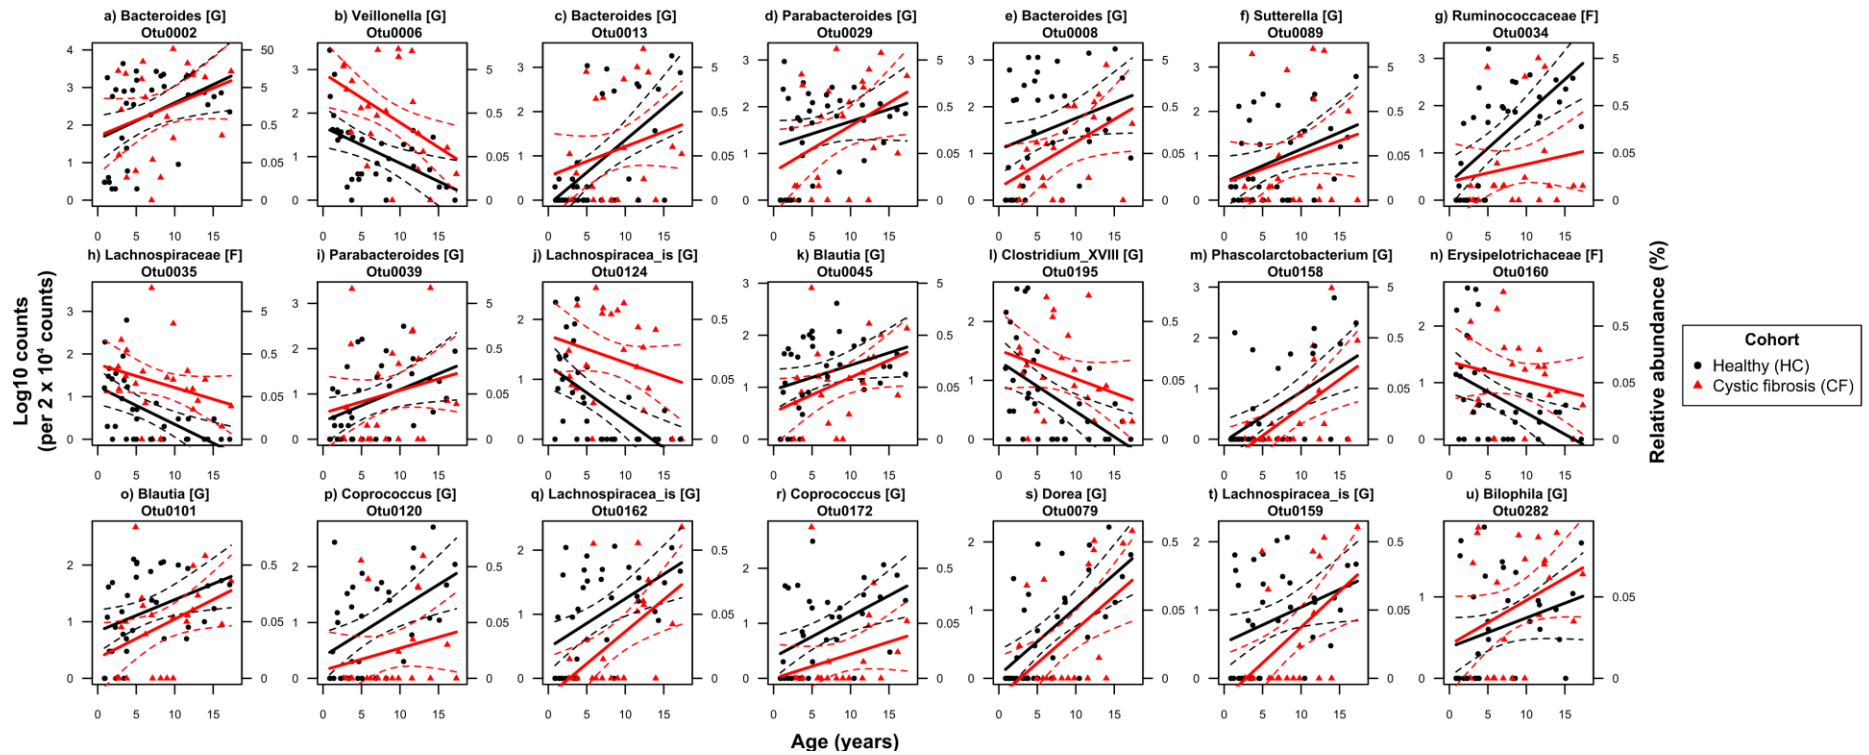

**Supplementary Figure 3.** Patterns of abundances of OTUs showing relationships with the covariates age and CF condition (based on F values > 5). The figure shows similar relationships between age and the abundance of OTUs in gut microbiomes communities from CF and healthy (HC) children. Fitted lines are constructed from general linear models. Letters in square brackets following taxonomic names denote the lowest level of taxonomic classification, G = genus, F = family, O = order, C = class.

Supplementary tables.

| Sample | Included_in_analysis | Treatment | SampleTime | Age  | ID  | FEV1%predicted | Tobramycin (nebulised) | Piperacillin | colomycin/ Colistin | Itraconazole | Fluconazol | prednisolone | Azithromycin | Flucloxacillin/ Flopen | Augmentin Duo | amoxycillin | 1. Antibiotics | 2a. S. aureus prophylaxis | 2b. S. aureus prophylaxis (0-3/5 year vs Long-term) | 3. H. influenzae | 4. Pseudomonas aeruginosa | 5a. Other microorganisms | 5b. Specify 5a                                        |  |
|--------|----------------------|-----------|------------|------|-----|----------------|------------------------|--------------|---------------------|--------------|------------|--------------|--------------|------------------------|---------------|-------------|----------------|---------------------------|-----------------------------------------------------|------------------|---------------------------|--------------------------|-------------------------------------------------------|--|
| 14     | Y                    | CF        | 1          | 2.66 | 50a |                | .                      | .            | .                   | .            | .          | .            | .            | o                      | .             | .           | o              | o                         | o                                                   | .                | .                         | o                        | Commensals                                            |  |
| 26     | Y                    | CF        | 1          | 2.76 | 41a |                | o                      | .            | .                   | .            | .          | .            | .            | o                      | .             | .           | o              |                           |                                                     |                  |                           |                          |                                                       |  |
| 35     | Y                    | CF        | 1          | 3.06 | 48a |                | .                      | .            | .                   | .            | .          | .            | .            | o                      | .             | .           | o              | o                         |                                                     | o                | o                         | o                        | Commensals                                            |  |
| 21     | Y                    | CF        | 1          | 3.63 | 52b |                | .                      | .            | .                   | .            | .          | .            | .            | .                      | .             | .           | o              | o                         | o                                                   | o                | .                         | o                        | Mycobacterium avium intercellulare                    |  |
| 50     | Y                    | CF        | 1          | 3.76 | 47b |                | .                      | .            | .                   | .            | .          | .            | .            | o                      | .             | .           | o              | o                         | o                                                   | o                | o                         | o                        | Commensals                                            |  |
| 76     | Y                    | CF        | 1          | 4.93 | 71a | 96             | .                      | .            | .                   | .            | .          | .            | o            | .                      | .             | .           | o              |                           |                                                     |                  |                           |                          |                                                       |  |
| 24     | Y                    | CF        | 1          | 5.72 | 43a | 97             | .                      | .            | .                   | .            | .          | .            | o            | .                      | .             | .           | o              | o                         | o                                                   | o                | o                         | o                        | Commensals                                            |  |
| 2      | Y                    | CF        | 1          | 5.86 | 3b  | 93             | .                      | .            | .                   | .            | .          | .            | .            | .                      | .             | .           | o              | o                         | o                                                   | o                | .                         | o                        | Branhamella catarrhalis; aspergillus fumigatus        |  |
| 19     | Y                    | CF        | 1          | 6.19 | 44a | 93             | .                      | .            | .                   | .            | .          | .            | .            | o                      | .             | .           | o              | o                         | .                                                   | o                | o                         | o                        | S. pneumoniae                                         |  |
| 56     | Y                    | CF        | 1          | 7    | 12a | 97             | .                      | .            | .                   | .            | .          | .            | .            | o                      | .             | .           | o              | o                         | .                                                   | o                | .                         | o                        | Commensals                                            |  |
| 23     | Y                    | CF        | 1          | 7.12 | 35b | 11             | .                      | .            | .                   | .            | .          | .            | .            | o                      | .             | .           | o              | o                         | o                                                   | o                | o                         | o                        | Commensals; aspergillus fumigatus; klebsiella species |  |
| 84     | Y                    | CF        | 1          | 8.17 | 32a | 86             | .                      | .            | .                   | .            | .          | .            | .            | o                      | .             | .           | o              | o                         | .                                                   | .                | o                         | o                        | Commensals; coliform                                  |  |
| 52     | Y                    | CF        | 1          | 9    | 15a | 64             | .                      | .            | .                   | .            | .          | .            | .            | o                      | .             | .           | o              | o                         | o                                                   | o                | o                         | o                        | Enterobacter sp.; commensals; Streptococcus; E. coli; |  |
| 78     | Y                    | CF        | 1          | 9.8  | 27b | 86             | o                      | .            | .                   | .            | .          | .            | o            | o                      | .             | .           | o              |                           |                                                     |                  |                           |                          |                                                       |  |
| 41     | Y                    | CF        | 1          | 9.82 | 34b | 10             | .                      | .            | .                   | .            | .          | .            | .            | o                      | .             | .           | o              | o                         | .                                                   | o                | .                         | o                        | E. coli; aspergillus fumigatus                        |  |
| 20     | Y                    | CF        | 1          | 11.5 | 8b  | 11             | .                      | .            | .                   | .            | .          | .            | .            | o                      | .             | .           | o              | o                         | .                                                   | .                | o                         | o                        | E. coli; Rhizopus sp.; MRSA; aspergillus fumigatus    |  |
| 74     | Y                    | CF        | 1          | 11.6 | 16b | 10             | .                      | .            | .                   | .            | .          | .            | .            | o                      | .             | .           | o              | o                         | .                                                   | o                | o                         | o                        | Enterobacter sp.; commensals; branhamella catarrhalis |  |
| 70     | Y                    | CF        | 1          | 12.3 | 28a | 84             | .                      | .            | .                   | .            | .          | .            | .            | .                      | .             | .           | o              | o                         | .                                                   | o                | .                         | o                        | S. pneumoniae; branhamella catarrhalis                |  |
| 43     | Y                    | CF        | 1          | 12.4 | 30b | 99             | .                      | .            | .                   | .            | .          | .            | .            | o                      | .             | .           | o              | o                         | o                                                   | .                | o                         | o                        | Candida albicans; RSV                                 |  |
| 47     | Y                    | CF        | 1          | 13   | 14a | 88             | o                      | .            | .                   | .            | .          | .            | o            | .                      | .             | .           | o              | .                         | .                                                   | o                | o                         | o                        | Aspergillus fumigatus                                 |  |
| 34     | Y                    | CF        | 1          | 13.9 | 7b  |                |                        |              |                     |              |            |              |              |                        |               |             | o              |                           |                                                     |                  |                           |                          |                                                       |  |
| 66     | Y                    | CF        | 1          | 16.1 | 26a | 72             | .                      | .            | .                   | .            | .          | .            | .            | o                      | .             | .           | o              | o                         | .                                                   | .                | o                         | .                        |                                                       |  |
| 27     | Y                    | CF        | 1          | 17.3 | 10b | 12             | o                      | .            | .                   | .            | .          | .            | o            | o                      | .             | .           | o              |                           |                                                     |                  |                           |                          |                                                       |  |
| 72     | Y                    | CF        | 3          | 1.46 | 51a |                | .                      | .            | .                   | .            | .          | .            | .            | o                      | .             | .           | o              | o                         |                                                     | o                | .                         | o                        | Aspergillus fumigatus                                 |  |
| 71     | N                    | CF        | 2          | 9    | 15b |                |                        |              |                     |              |            |              |              |                        |               |             | o              | o                         | o                                                   | o                | o                         | o                        | Enterobacter sp.; commensals; Streptococcus; E. coli; |  |
| 86     | N                    | CF        | 2          | 11   | 30a | 10             | .                      | .            | .                   | .            | .          | .            | .            | o                      | .             | .           | o              | o                         | o                                                   | .                | o                         | o                        | Candida albicans; RSV                                 |  |
| 87     | N                    | CF        | 2          | 9.38 | 32b | 95             | .                      | .            | .                   | .            | .          | .            | o            | .                      | .             | .           | o              | o                         | .                                                   | .                | o                         | o                        | Commensals; coliform                                  |  |
| 51     | N                    | CF        | 2          | 5    | 35a | 10             | .                      | .            | .                   | .            | .          | .            | .            | o                      | .             | .           | o              | o                         | o                                                   | o                | o                         | o                        | Commensals; aspergillus fumigatus; klebsiella species |  |
| 90     | N                    | CF        | 2          | 3.5  | 47a |                | .                      | .            | .                   | .            | .          | .            | .            | o                      | .             | .           | o              | o                         | o                                                   | o                | o                         | o                        | Commensals                                            |  |
| 45     | N                    | CF        | 2          | 3.92 | 48b |                | o                      | .            | .                   | .            | .          | .            | .            | o                      | .             | .           | o              | o                         |                                                     | o                | o                         | o                        | Commensals                                            |  |
| 89     | N                    | CF        | 2          | 1.63 | 51b |                | .                      | .            | .                   | .            | .          | .            | .            | o                      | .             | .           | o              | o                         |                                                     | o                | .                         | o                        | Aspergillus fumigatus                                 |  |

Supplementary Table 1. Antibiotic use within the CF cohort (o = Yes and . = No, empty cells = No data)
